# Supplementary material for: The Human Bone Marrow Is Host to the DNAs of Several Viruses
Source: PubMed Central journal article supplement (PMC8100435; doi:10.3389/fcimb.2021.657245), 2021-04-22
Supplement: DataSheet_1.pdf [file DataSheet_1.pdf]

## Supplementary Material

### 1 Supplementary Tables

**Supplementary Table 1.** In-house qPCR oligos and commercial qPCR assays used in this study.

| In-house assays  |                      |                                                |          |                                                   |
|------------------|----------------------|------------------------------------------------|----------|---------------------------------------------------|
| qPCR             | Oligo name           | Target sequence (5'-3')                        | Organism | Reference                                         |
| Pan-B19V<br>qPCR | B19MT1               | CCACTATGAAAACCTGGGCAATA                        | B19V     | Toppinen <i>et al.</i><br>J Virol Methods<br>2015 |
|                  | B19MT2               | GCTGCTTTCAGTGTCTCTCA                           |          |                                                   |
|                  | B19MTP1              | FAM-AATGCAGATGCCCTCCACCCAG-BHQ1                |          |                                                   |
| TTV-<br>qPCR     | AMTS                 | GTGCCGNAGGTGAGTTTA                             | TTV      | Toppinen <i>et al.</i><br>FSIG 2020               |
|                  | AMTAS                | GGAAGTGGCCGGGCT                                |          |                                                   |
|                  | AMTAS <sub>gr4</sub> | GGTCTGGCCGGGCT                                 |          |                                                   |
|                  | AMTPTU P             | FAM-TCAAGGGGCAATTCGGGCT-BHQ1                   |          |                                                   |
| HERQ-9           | HSV-1FWDLP1          | GTTGAGCTAGCCAGCGA                              | HSV1     | Pyöriä <i>et al.</i><br>mSphere 2020              |
|                  | HSV-1REVLP1          | CGTTAAGGACCTTGGTGAGC                           |          |                                                   |
|                  | HSV-1ProbeLP1        | FAM-CGCGAACTGACGAGCTTTGTG-BHQ1                 |          |                                                   |
|                  | HSV2 FWD-2-2         | CACACCACACGACAACAA                             | HSV2     |                                                   |
|                  | HSV-2REVLP1          | TAGTTCAAACACGGAAGCC                            |          |                                                   |
|                  | HSV-2probeLP1        | JOE-CGGCGATGACGGCAATAAA-BHQ1                   |          |                                                   |
|                  | VZVFWDLP1            | GCGCAAGGCTATTAGAGC                             | HHV3     |                                                   |
|                  | VZVREVLP1            | ACATGGCAGAAATCCCTG                             |          |                                                   |
|                  | VZVprobeLP1          | TxRd-CGCATACCCGGAAGTTCTTCAGAT-BHQ2             |          |                                                   |
|                  | H5 FWD211            | GTGYTCCGTGAATCGTTAC                            | HHV5     |                                                   |
|                  | H5 rev 211           | AGTCKACCTCGATATCACAAGTCG                       |          |                                                   |
|                  | H5 Probe 20          | TxRd-ACCCTGCTGCCCCAGT-BHQ2                     |          |                                                   |
|                  | HHV6A FWD1-3         | CGGCCTCCAGAGTTGTAA                             | HHV6A    |                                                   |
|                  | HHV6A REV 10         | TGTCCCTTCAACTACTGAATC                          |          |                                                   |
|                  | HHV6A Probe A1^      | FAM-AC[+A]T[+G]TTGC[+T]A[+G]AAA[+G][+A]CT-BHQ1 |          |                                                   |
|                  | HHV6A Probe A2^      | FAM-AC[+A]T[+G]TTGC[+T]A[+C]AAA[+G][+A]CT-BHQ1 |          |                                                   |
|                  | HHV6b FOTY1          | TTTGACAGGAGTTGCTGAG                            | HHV6B    |                                                   |
|                  | H6B ROTY 1           | GGATTCAGGAAAAAGGTTCTAA                         |          |                                                   |
|                  | H6B PROBE MVP        | JOE-AGGAAGCGTTTCGGTACACTTGGAG-BHQ1             |          |                                                   |
|                  | HHV7 1. FWD          | CTCGCAGATTGCTTGTG                              | HHV7     |                                                   |
|                  | HHV7 1. REV          | GCATACACCAACCCTACTGTAA                         |          |                                                   |
|                  | H7 MOP PROBE         | TxRd-TTAGGCATCACGTTGGCATTG-BHQ2                |          |                                                   |
|                  | HHV8 fwd 3.1         | ATATACGGCGACACTGACTC                           | HHV8     |                                                   |
|                  | HHV8 REV 10          | GAGCAGAAGGCACTTGAAG                            |          |                                                   |
|                  | H8 Probe 300         | JOE-CGGAGGAGCTAGCGTCAATCA-BHQ1                 |          |                                                   |

*Supplementary Table 1 continues.*

| qPCR                          | Oligo name | Target sequence (5'-3')                                                                       | Organism                  | Reference                                         |
|-------------------------------|------------|-----------------------------------------------------------------------------------------------|---------------------------|---------------------------------------------------|
| MCPyV<br>LT-qPCR              | MCPyV-LT-F | CCACAGCCAGAGCTCTTCCT                                                                          | MCPyV                     | Goh <i>et al.</i><br>EID 2009                     |
|                               | MCPyV-LT-R | TGGTGGTCTCCTCTCTGCTACTG                                                                       |                           |                                                   |
|                               | MCPyV-LT-P | FAM-TCCTTCTCAGCGTCCCAGGCTTCA-TAMRA                                                            |                           |                                                   |
| RNaseP-<br>qPCR               | RnaseP-FWD | GAGGGAAGCTCATCAGTGGGG                                                                         | human<br>(RnaseP<br>gene) | Toppinen <i>et al.</i><br>J Virol Methods<br>2015 |
|                               | RnaseP-REV | CTTGGAAGGTCTGAGACTAGGG                                                                        |                           |                                                   |
|                               | RnaseP-P   | FAM-AGTGCCTCCTGTCACTCCACTC-BHQ1                                                               |                           |                                                   |
| <b>Commercial assays used</b> |            |                                                                                               |                           |                                                   |
| <b>product code</b>           |            | <b>assay name</b>                                                                             | <b>Organims</b>           | <b>Manufacturer</b>                               |
| HBV/ISEX/025                  |            | Hepatitis B Virus (HBV) PCR Kit, target: conservative sequence of open reading frame X (ORFx) | Hepatitis B virus         | GeneProof, Genesig                                |
| Z-Path-HPV31-std              |            | Human papillomavirus 31 Standard kit, target: E6 gene                                         | Human papilloma-virus 31  | PrimerDesign                                      |

^ Nucleotides in [ ] refer to locked nucleic acids

**Supplementary Table 2.** Viral reads of individual 4 that mapped to Merkel cell polyomavirus (Genbank accession number KF266964.1) by NCBI BLAST. The coverage profile is shown in Figure 3.

| read count | read sequence (5'-3')                                                                                                                                           | BLAST            |              |
|------------|-----------------------------------------------------------------------------------------------------------------------------------------------------------------|------------------|--------------|
|            |                                                                                                                                                                 | query coverage % | similarity % |
| 1          | TATAATGATGGAATTGAACACCCCTTTGGAGCAAATTCAGCAAAATATCCACA<br>AGCTCAGAAGTGACTTCTCTATGTTTGATGAGGGCAGTACAAAATTCCT                                                      | 100              | 98.06        |
| 1          | GACTGGTGGCAAAAACTTGAGAAGAACTGACTACTGCTTACTGCCTCTGCA<br>CCTTTTCTCGACTCCTACTTCCTTCCTCTGTAAGTATTAGATATGGAAAAGTCT<br>ATAAGGCAAAATATCAAAGAAAGGTTATTTATGACAGATTTTCT   | 100              | 96.03        |
| 1          | CCAACAAGCCGCAGACACTGTTCTAGCCACAAGGAGGTTAGA                                                                                                                      | 100              | 95.24        |
| 1          | ACCTTTTGAAGTAGGCTGTGCTTTGGATAAATTTATGGTTGTTTTGCGGCTGT<br>GAAAGGGCAAAATAGCCTAAATA                                                                                | 100              | 96.10        |
| 1          | CAGAACATGGAAATAAGAAAAAGAAGAATTCTTCAAAGTGAACCACTGTAT<br>TGCTTTGTCTTATTTGGTGCTTGCTGATACCACCTTTAAGCCTTGCTTACAAG<br>AAGTAATTA AAAACTGGAAGCAAATTTTACAGAGTGAAGTAGAGC  | 100              | 97.28        |
| 1          | TCAAAGTGAACCACTTTATTGCTTTGTCTTATTTGGTGCTTGCTGATACAAC<br>CTTTAAGCCTTGCTTACAAGAAGAAATTA AAAACTGGAAGCAAA                                                           | 100              | 100          |
| 1          | GGCAGCAAATTTTACAGCGTGAAATATCAGATGGTAAATTTTGTCAAATGAGA<br>GAAAATGTAGAAGCTGGTCAGGACCCTCTG                                                                         | 100              | 95.18        |
| 1          | GTAACAGTTTTCTCCTGCCCAAATTTATCTAAAAATCTGACAATATCAGGAT<br>CACCAGGTAATTGTTCTGCCCCCTCATATATACTGACCTCTTCTACCTGAGTAT<br>CTTTCCCTACCATAGGTTGGCCTGACACTTTTGGCATTAAAGTTG | 100              | 96.03        |
| 1          | CCTCAATTTGGGTAATGCTATCTTCTCCAGTAACCACAGATAACAATTCCACTC<br>GTCCTTAACCAGCAGTTTTG                                                                                  | 100              | 91.89        |
| 1          | AATATCTTGCCCCACAGAATGCAGCAAGCTATTTTCCACTGCAGAGGATCTA<br>GGCTAAAGGCCATAAGTGCATGCCTCAAAACCTCATTACTACCTACCCACGAA<br>ACATCCCTCTTACAAGTGAC                           | 100              | 100          |
| 1          | CACAGAATGCAGCAAGCTATTTTCCACTGCAGAGGATCTAGGCTAAAGGCC<br>ATACGTGCATGCCTC                                                                                          | 100              | 98.51        |

**Supplementary Table 3.** Viral reads of individual 21 that mapped to Torque teno virus (Genbank accession number AF122914.3) by NCBI BLAST. The coverage profile is shown in Figure 3.

| read count | read sequence (5'-3')                                                                                                                                      | BLAST            |              |
|------------|------------------------------------------------------------------------------------------------------------------------------------------------------------|------------------|--------------|
|            |                                                                                                                                                            | query coverage % | similarity % |
| 1          | AATGGCTGAGTTTTCCACGCCCCTCCGAGCGGTGAAGCCACGGAGGGAGCT<br>CAGCGCGTCCCAGGGCGGGTGCCGGAGGTGAGTTTACACACCCGAGTCAAG<br>GGGCAATTCGGGCTCGGGA                          | 100              | 100          |
| 1          | CGGCAGAGGATCCGCGCGTCCCAGGGCGGGTGCCGAAGGTGAGTTTACACA<br>CCGAAGTCAAGGGCAATTCGGGCTCGGGACTGGCCGGGCTATGGGCAAGAC<br>TCTTAAAA                                     | 91               | 95.10        |
| 1          | GGACATCTACCGGTCCCAGGGCGGGTGCCGAAGGTGAGTTTACACACCCG<br>AGTCAAGGGCAATTCGGGCTCGGGACTGGCCGGGCTATGGGCAAGGCTCT<br>AAGGTTA                                        | 86               | 96.88        |
| 1          | CGAGCGTCCCAGGGCGGGTGCCGGAGGTGAGTTTACACACCCGAGTCAAGG<br>GGCAATTCGGGCTCGGGACTGGCCGGGCCATGGGCAAGACTCTTAAAAAAG                                                 | 96               | 96.94        |
| 1          | AGGGCGGGTGCCGTAGGTGAGTTTACACACCCGAGTCAAGGGGCAATTCGGG<br>CTCGGGACTGGCCGGACCCCGGGCAA                                                                         | 100              | 92.31        |
| 1          | CGAAGGTGAGTTTACACACCCGAGTCAAGGGGCAATTCGGGCTCGGGACTGG<br>CCGGGCTATGGGCAAGGCTCTTAAAAAAGCATGTTTCTTGGTAGGGTACACCG<br>AAAGAAAA                                  | 100              | 91.23        |
| 1          | GAGGTGAGTTTACACACCCGAGTCAAGGGGCAATTCGGGCTCGGGACTGGCC<br>GGGCTATGGGCAAGGCTCTTAAAAAGGCATGTTTCTCGGTAAACTCTACA                                                 | 84               | 96.55        |
| 1          | GAGTCAAGGGGCAATTCGGGCTCGGGACTGGCCGGACCCCGGGCAAGGCTCT<br>TAAAAACGCCATGTTTT                                                                                  | 97               | 91.04        |
| 1          | CAGTCAAGGGGCAATTCGGGCTCGGGACTGGCCGGGCTATGGGCAAG                                                                                                            | 100              | 97.87        |
| 1          | CAAGGGGCAATTCGGGCTCGGGACTGGCCGGGCTATGGGCAAGGCTCTTAAA<br>AAGGCA                                                                                             | 98               | 96.49        |
| 2          | GAAAAGAAAAGGCAGACGTAGAAGAAAAGCAAAAATAATAAAGACAGTG<br>GCAGCCAAACTACAGAAGAAGATGTAATATAGTAGGCTACCTTCTATACTTA<br>TCTGTGGTAAAATACTGTTTCTAGAACTATGCCACACACTCAGAC | 100              | 97.35        |
| 1          | GTGGCAGCCAAACTACAGAAGAAGATGTAATATAGTAGGCTACCTTCTATAC<br>TTATCTGTGGTAAAATACTGTTTCTAGAACTATGCCA                                                              | 100              | 96.74        |

*Supplementary Table 2 continues.*

| read count | read sequence (5'-3')                                                                                                                                          | BLAST            |              |
|------------|----------------------------------------------------------------------------------------------------------------------------------------------------------------|------------------|--------------|
|            |                                                                                                                                                                | query coverage % | similarity % |
| 1          | CCTCTGTGACATGACACTACTAACTATCTATGCAACCGCAGCGGATATGCAAT<br>ATCCGTTCCGGCTCACCCTAACTGACACTGTGGTTGTAACTTCCAGGTTCTGC<br>AATCCATGTATGACAATACAATTAGCATATTACCTGAGGAAAAG | 99               | 95.33        |
| 1          | TATGCAACCGCAGCGGATATGCAATATCCGTTCCGGCTCACCCTAACTGACAC<br>TGTGGTTGTAACTTCCAGGTTCTGCAATCCATGTATGACAATACAATTAGCAT<br>ATTACCTGAGGAAAAGTCAAACAGAGACAATCTTCTAACATCTA | 100              | 89.40        |
| 1          | TAGTACACACAAACCCCAAAAAAGGCTTTGTACCTTATTCTTTAAACTTTGGA<br>AATGGTAAAATGCCAGGA                                                                                    | 100              | 94.37        |
| 1          | ACTTTGGAAATGGTAAAATGCCAGGAGGTAGTAGCAACGTTCCATAAGAAT<br>GAGAGCTAAATGGTACCCCACTCTATTTCACCAACAAGAAGTTCTAGAGGCC<br>TAGCACAGTCAGGACCCTTTGCTTATCACTCAG               | 100              | 94.93        |
| 1          | GCTGACACGCTCGCGCGTGTGTCAGACCACTTCGGGCTCGCGGGGGTCCGGAATT<br>TTGCTAAACAGACTCCCAGTTGCCATTG                                                                        | 100              | 96.30        |
| 1          | GCTGTGAATCAGTAACGAAAGTGAGTGGGGCCAGACTTCGCCATAAGGCCTTT<br>AACTTTGGGTGCTGTGCA                                                                                    | 80               | 96.55        |
| 1          | GGGGGACGGAATCTTTATTAACAGACTCCAGGTTGCCATTGGACACTGGAGC<br>TGTGAATTAGTAACGAAAGTGAGTGGGGCCAGACTTCGCCATAAGGCCTTTAT<br>CTTCTTGCCATTGTCCGTGTCGGGGGTTGCCATAGGCTTCGGGC  | 100              | 88.08        |
| 1          | TCTTTATTAACAGACTCCAGGTTGCCATTGGACACTGGAGCTGTGAATTAGT<br>AACGAAAGTGAGTGGGGCCAGACTTCGCCATAAGGCCTTTATCTTCTTGCCAT<br>TTGTCCGTGTCGGGGGTTGCCATAGGCTTCGGGCTCGGTTTTAGG | 95               | 90.28        |

**Supplementary Table 4.** Viral reads of individual 25 that yielded by NCBI BLAST closest match (given as query coverage and similarity percentages) to human papillomavirus type 31 (Genbank accession number LR862018.1).

| read count | read sequence (5'-3')                                                                                                                                            | BLAST            |              |
|------------|------------------------------------------------------------------------------------------------------------------------------------------------------------------|------------------|--------------|
|            |                                                                                                                                                                  | query coverage % | similarity % |
| 2          | GAAAATGAAGACAGTAGTGATACTGGGGAGGATATGGTTGACTTTATTGACA<br>AT                                                                                                       | 100              | 100          |
| 2          | GTCCCAAATGGTACAATGGGCATATGACAATGATGTTATGGATGATAGTGAA<br>ATTGCCTA                                                                                                 | 100              | 100          |
| 1          | ACAAAGTTAGTGACGAAGGTGACTGGAGGGACATAGTAAAGTTTTTAAGATA<br>TCAACAAATAGAATTTGTGTCAATTTTATCTGCATTAAGCTG                                                               | 100              | 100          |
| 1          | TTACATCTAATATAAATGCAGGTAAGGATGACAGATGGCCATACCTACATAGC<br>AGACTGGTGGTTTTTACATT                                                                                    | 100              | 100          |
| 1          | CACCTGTAGAAACATCAGGTCATTTACTACTTTTCATCATCATCTATTAGCACAC<br>ATAATTATGAGGAAATACCTATGGATACATTTATTGTTTCTACTAATAATGAA<br>AACATAACAAGTAGCACACCCATTCCAGGGGTGCGCCGTCCTGC | 100              | 99.34        |
| 1          | ATCATCTATTAGCACACATAATTATGAGGAAATACCTATGGATACATTTATTG<br>TTTCTACTAATAATGAAAACATAACAAGTAGCACACCCATTCCAGGGGTGCGC<br>CGTCCTGCACGTTTAGGGTTATATAGTAAGGCTACACAACAAGTA  | 100              | 100          |
| 2          | TGGCCTGATGTACCTATAGAGCATGCACCTACACAGGTTTCCCATTTCTTTG<br>GCCCCACAACGCCACAAGTGCTATTTTTGTTGATGGGGGTGATTTTTATTG<br>CACCTAGTTATTATATGTTAAAACGTCGACGTAAACGTGTAT        | 99               | 98.67        |
| 1          | AATGGTTGCTGAGCCATATGGCGATACATTATTTTTTTATTTACGTAGGGAAC<br>AAATGTTTGTAAGGCATTTTTTTAATAGATCAGGC                                                                     | 100              | 98.86        |
| 1          | GAATTTTGGATTGACCACACCTCCCTCAGGTTCTTTGGAGGATACCTATAGGTT<br>TGTCACCTCACAGGCCATTACATGTCAAAAACTGCCCCCAAAGGCCCAAGG<br>AAGATCCATTTAAAGATTATGTATTTTGGG                  | 100              | 97.81        |
| 2          | ACACCTTGCCAACATATAATCCAGTCCAACCTTTGCAATTATACTATGAATCAT<br>GTTTGTTTAAATACAACCTGTAGTTCAACTATGTGTC                                                                  | 100              | 97.75        |

**Supplementary Table 5.** The reconstructed sequences of parvovirus B19 derived from the same individuals' bone and bone marrow. Mutation position is given from bone sequence.

| Case number | Genotype | B19V sequence in bone    |                                 | B19V sequence in bone marrow |                                 | Mutation                                                                              |
|-------------|----------|--------------------------|---------------------------------|------------------------------|---------------------------------|---------------------------------------------------------------------------------------|
|             |          | Genbank accession number | % of genome recovered (breadth) | Genbank accession number     | % of genome recovered (breadth) |                                                                                       |
| 1           | 2        | MT410184                 | 99.9 %                          | MT988397                     | 91.9 %                          | identical in the reconstructed genomic areas                                          |
| 6           | 2        | MT410190                 | 85.9 %                          | MT988403                     | 88.8 %                          | at the nucleotide position 4095<br>G in bone, A in bone marrow<br>(VP1/2, synonymous) |
| 8           | 2        | MT410186                 | 87.2 %                          | MT988398                     | 75.8 %                          | at the nucleotide position 352<br>G in bone, T in bone marrow<br>(noncoding region)   |
|             |          |                          |                                 |                              |                                 | at the nucleotide position 4276<br>C in bone, T in bone marrow<br>(VP1/2, synonymous) |
|             |          |                          |                                 |                              |                                 | at the nucleotide position 5235<br>C in bone, A in bone marrow<br>(noncoding region)  |
|             |          |                          |                                 |                              |                                 | at the nucleotide position 5302<br>A in bone, C in bone marrow<br>(noncoding region)  |
| 10          | 1        | MT410187                 | 100 %                           | MT988400                     | 97.2 %                          | at the nucleotide position 2032<br>G in bone, A in bone marrow<br>(NS1, synonymous)   |
|             |          |                          |                                 |                              |                                 | at the nucleotide position 2114<br>C in bone, T in bone marrow<br>(NS1, synonymous)   |

NS1= non-structural protein 1; VP1/2= capsid protein ½

## 2 Supplementary File References

- Goh, S., Lindau, C., Tiveljung-Lindell, A., and Allander, T. (2009). Merkel cell polyomavirus in respiratory tract secretions. *Emerging Infectious Diseases* 15, 489–91. doi:10.3201/eid1503.081206.
- Pyöriä, L., Jokinen, M., Toppinen, M., Salminen, H., Vuorinen, T., Hukkanen, V., et al. (2020). HERQ-9 Is a New Multiplex PCR for Differentiation and Quantification of All Nine Human Herpesviruses. *mSphere* 5, e00265-20. doi:10.1128/mSphere.00265-20.
- Toppinen, M., Norja, P., Aaltonen, L. M., Wessberg, S., Hedman, L., Söderlund-Venermo, M., et al. (2015). A new quantitative PCR for human parvovirus B19 genotypes. *Journal of Virological Methods* 218, 40–45. doi:S0166-0934(15)00082-8.
- Toppinen, M., Pratas, D., Väisänen, E., Söderlund-Venermo, M., Hedman, K., Perdomo, M. F., et al. (2020). The landscape of persistent human DNA viruses in femoral bone. *Forensic Science International: Genetics* 48, 102353. doi:10.1016/j.fsigen.2020.102353.
